# Supplementary material for: Modulation of the endogenous omega-3 fatty acid and oxylipin profile in vivo—A comparison of the fat-1 transgenic mouse with C57BL/6 wildtype mice on an omega-3 fatty acid enriched diet
Source: PubMed Central journal article supplement (PMC5590967; doi:10.1371/journal.pone.0184470), 2017-09-08
Supplement: pone.0184470.s009.pdf [file pone.0184470.s009.pdf]

**S1 Table. Determined fat content<sup>#</sup>, peroxide value<sup>+</sup> and fatty acid composition\* of the experimental diets.**

Diets were based on a standard experimental diet from ssniff Spezialdiäten GmbH (product number: E15051; with 17.6% crude protein, 5.0% crude fiber, 5.3% crude ash, 31.4% starch, 11.0% sugar and 10.1% fat as specified by the manufacturer). All results are shown as mean  $\pm$  deviation from the mean (n=2).

|                                                       | <b>STD</b>         | <b>STD+n3</b>     |
|-------------------------------------------------------|--------------------|-------------------|
| <b>Determined fat content</b><br>in the diet [g/100g] | 9.7 $\pm$ 0.2      | 9.9 $\pm$ 0.2     |
| <b>Peroxide value</b><br>[mEq O <sub>2</sub> /kg]     | 2.6 $\pm$ 0.1      | 3.6 $\pm$ 0.1     |
| <b>[%] Fatty Acid</b><br>in lipid extract             |                    |                   |
| C14:0                                                 | 0.15 $\pm$ 0.05    | 0.19 $\pm$ 0.04   |
| C15:0                                                 | 0.07 $\pm$ 0.02    | -                 |
| C16:0                                                 | 7.995 $\pm$ 0.008  | 6.61 $\pm$ 0.05   |
| C16:1n7                                               | 0.217 $\pm$ 0.008  | 0.24 $\pm$ 0.03   |
| C17:0                                                 | 0.071 $\pm$ 0.007  | 0.058 $\pm$ 0.007 |
| C18:0                                                 | 3.288 $\pm$ 0.001  | 2.64 $\pm$ 0.03   |
| C18:1n9                                               | 27.064 $\pm$ 0.004 | 21.65 $\pm$ 0.06  |
| C18:1n7                                               | 1.26 $\pm$ 0.04    | 1.047 $\pm$ 0.003 |
| C18:2n6                                               | 58.306 $\pm$ 0.003 | 46.5 $\pm$ 0.1    |
| C18:3n3                                               | 0.335 $\pm$ 0.005  | 0.287 $\pm$ 0.003 |
| C20:0                                                 | 0.218 $\pm$ 0.003  | 0.184 $\pm$ 0.004 |
| C20:1n9                                               | 0.167 $\pm$ 0.002  | 0.14 $\pm$ 0.01   |
| C20:4n6                                               | -                  | 0.303 $\pm$ 0.003 |
| C20:5n3                                               | -                  | 8.91 $\pm$ 0.07   |
| C22:0                                                 | 0.653 $\pm$ 0.008  | 0.95 $\pm$ 0.03   |
| C22:5n3                                               | -                  | 1.18 $\pm$ 0.05   |
| C24:0                                                 | 0.204 $\pm$ 0.008  | -                 |
| C22:6n3                                               | -                  | 8.91 $\pm$ 0.09   |
| C24:1n9                                               | -                  | 0.17 $\pm$ 0.02   |

<sup>#</sup>For the determination of the fatty acid composition and the peroxide value, lipids were first extracted from the pellets according to the Weibull-Stoldt method, performed as rapid microextraction [1].

<sup>+</sup>Determination of the peroxide value was performed by iodometry as described [3]. Briefly, after dissolving the lipid extract in acetic acid/isooctane (3:2, v:v) and addition of potassium iodide the formed iodine titrated with sodium thiosulfate.

\*The fatty acid composition was determined after derivatization to fatty acid methyl esters by means of gas chromatography with flame ionization detection using response factors [2].

## References

1. Schulte E. Vereinfachte Mikromethode zur gravimetrischen Bestimmung des Fettgehaltes von Lebensmittels nach Säureaufschluss (Kurzmitteilung). Deutsche Lebensmittelrundschau. 2004;100(5):188-9.
2. Ostermann AI, Muller M, Willenberg I, Schebb NH. Determining the fatty acid composition in plasma and tissues as fatty acid methyl esters using gas chromatography - a comparison of different derivatization and extraction procedures. Prostaglandins Leukot Essent Fatty Acids. 2014;91(6):235-41.
3. Untersuchung von Lebensmitteln, Bestimmung der Peroxidzahl in tierischen und pflanzlichen Fetten und Ölen, Iodometrische (visuelle) Endpunktbestimmung (13.00-37). In Amtliche Sammlung von Untersuchungsverfahren nach § 64 LFBG, 2012; BVL.
