# Supplementary material for: Modulation of the endogenous omega-3 fatty acid and oxylipin profile in vivo—A comparison of the fat-1 transgenic mouse with C57BL/6 wildtype mice on an omega-3 fatty acid enriched diet
Source: PubMed Central journal article supplement (PMC5590967; doi:10.1371/journal.pone.0184470), 2017-09-08
Supplement: pone.0184470.s010.pdf [file pone.0184470.s010.pdf]

**S2 Table. Fatty acid composition of the standard mouse diet.**

Shown are specifications according to the manufacturer ssniff Spezialdiäten GmbH (product number: V1530; with 19.0% crude protein, 4.9% crude fiber, 6.4% crude ash, 36.5% starch, 4.7% sugar and 3.3% fat as specified by the manufacturer).

|       | <b>[%] Fatty Acid<br/>in diet</b> |
|-------|-----------------------------------|
| C14:0 | 0.01                              |
| C16:0 | 0.47                              |
| C16:1 | 0.01                              |
| C18:0 | 0.08                              |
| C18:1 | 0.62                              |
| C18:2 | 1.80                              |
| C18:3 | 0.23                              |
| C20:0 | 0.01                              |
| C20:1 | 0.02                              |
| C20:5 | -                                 |
| C22:6 | -                                 |
