# Supplementary material for: Modulation of the endogenous omega-3 fatty acid and oxylipin profile in vivo—A comparison of the fat-1 transgenic mouse with C57BL/6 wildtype mice on an omega-3 fatty acid enriched diet
Source: PubMed Central journal article supplement (PMC5590967; doi:10.1371/journal.pone.0184470), 2017-09-08
Supplement: pone.0184470.s014.pdf [file pone.0184470.s014.pdf]

**S6 Table: Statistical comparison of the fatty acid profile during the course of the feeding experiment with the n3-PUFA enriched diet vs D0.** Statistical differences were determined using one-way ANOVA followed by Dunnett's post test (\* p<0.05, \*\* p<0.01, \*\*\* p<0.001, \*\*\*\* p<0.0001; n.s. = not significant).

|             |     | EPA  | DHA  | ARA  | n6-PUFA | n3-PUFA | MUFA | SFA  |
|-------------|-----|------|------|------|---------|---------|------|------|
| Whole Blood | D7  | **** | **** | **** | ****    | ****    | *    | n.s. |
|             | D14 | **** | **** | **** | ****    | ****    | **   | n.s. |
|             | D30 | **** | **** | **** | ****    | ****    | **   | n.s. |
|             | D45 | **** | **** | **** | ****    | ****    | ***  | n.s. |
| Plasma      | D7  | **** | **** | **** | ****    | ****    | **** | n.s. |
|             | D14 | **** | **** | **** | ****    | ****    | **** | n.s. |
|             | D30 | **** | **** | **** | ****    | ****    | **** | **   |
|             | D45 | **** | **** | **** | ****    | ****    | **** | n.s. |
| Blood Cells | D7  | **** | **** | **** | ****    | ****    | ***  | *    |
|             | D14 | **** | **** | **** | ****    | ****    | n.s. | **   |
|             | D30 | **** | **** | **** | ****    | ****    | **   | **   |
|             | D45 | **** | **** | **** | ****    | ****    | *    | ***  |
| Liver       | D7  | **** | **** | **** | ****    | ****    | **** | ***  |
|             | D14 | **** | **** | **** | ****    | ****    | *    | n.s. |
|             | D30 | **** | **** | **** | ****    | ****    | ***  | n.s. |
|             | D45 | **** | **** | **** | **      | ****    | **   | n.s. |
| Kidney      | D7  | **** | **** | **   | ****    | ****    | ***  | n.s. |
|             | D14 | **** | **** | **** | ****    | ****    | **   | n.s. |
|             | D30 | **** | **** | **** | ****    | ****    | **** | n.s. |
|             | D45 | **** | **** | **** | ****    | ****    | ***  | n.s. |
| Spleen      | D7  | **** | **** | n.s. | n.s.    | ****    | ***  | *    |
|             | D14 | **** | **** | **   | **      | ****    | **   | *    |
|             | D30 | **** | **** | ***  | ***     | ****    | ***  | **   |
|             | D45 | **** | **** | **** | ***     | ****    | **   | n.s. |
| Brain       | D7  | **** | n.s. | *    | n.s.    | n.s.    | n.s. | n.s. |
|             | D14 | **** | n.s. | n.s. | n.s.    | n.s.    | n.s. | n.s. |
|             | D30 | **** | **   | **** | ****    | ***     | n.s. | n.s. |
|             | D45 | **** | n.s. | **** | ****    | n.s.    | n.s. | n.s. |
| Colon       | D7  | **   | n.s. | **** | n.s.    | *       | n.s. | **** |
|             | D14 | **** | **   | **** | ***     | ****    | n.s. | **   |
|             | D30 | **   | n.s. | **** | *       | **      | n.s. | **   |
|             | D45 | **** | **** | **** | *       | ****    | n.s. | *    |
