# Supplementary material for: Modulation of the endogenous omega-3 fatty acid and oxylipin profile in vivo—A comparison of the fat-1 transgenic mouse with C57BL/6 wildtype mice on an omega-3 fatty acid enriched diet
Source: PubMed Central journal article supplement (PMC5590967; doi:10.1371/journal.pone.0184470), 2017-09-08
Supplement: pone.0184470.s015.pdf [file pone.0184470.s015.pdf]

**S7 Table: Statistical comparison of the fatty acid profile in transgenic *fat-1* mice and wild type animals (WT-STD) on a standard sunflower oil based diet, as well as in wild type mice on the same diet enriched with EPA and DHA (WT-STD+n3) after 30 days of feeding. Statistical differences were determined using one-way ANOVA followed by Tukey's post test (\* p<0.05, \*\* p<0.01, \*\*\* p<0.001, \*\*\*\* p<0.0001; n.s. = not significant).**

|             |                           | EPA  | DHA  | ARA  | n6-PUFA | n3-PUFA | MUFA | SFA  |
|-------------|---------------------------|------|------|------|---------|---------|------|------|
| Whole Blood | WT-STD vs <i>fat-1</i>    | n.s. | **** | **** | ****    | ****    | n.s. | n.s. |
|             | WT-STD vs STD+n3          | **** | **** | **** | ****    | ****    | n.s. | ***  |
|             | <i>fat-1</i> vs WT-STD+n3 | **** | **** | **** | ****    | ****    | n.s. | **   |
| Plasma      | WT-STD vs <i>fat-1</i>    | +    | **** | *    | ***     | **      | n.s. | n.s. |
|             | WT-STD vs STD+n3          | +    | **** | **** | ****    | ****    | n.s. | n.s. |
|             | <i>fat-1</i> vs WT-STD+n3 | **** | **** | **** | ****    | ****    | n.s. | n.s. |
| Blood Cells | WT-STD vs <i>fat-1</i>    | +    | **** | **** | ****    | ****    | n.s. | n.s. |
|             | WT-STD vs STD+n3          | +    | **** | **** | ****    | ****    | n.s. | **   |
|             | <i>fat-1</i> vs WT-STD+n3 | **** | **** | **** | ****    | ****    | n.s. | *    |
| Liver       | WT-STD vs <i>fat-1</i>    | +    | **   | *    | *       | *       | n.s. | n.s. |
|             | WT-STD vs STD+n3          | +    | **** | **** | ****    | ****    | n.s. | n.s. |
|             | <i>fat-1</i> vs WT-STD+n3 | **** | **** | **** | ****    | ****    | *    | n.s. |
| Kidney      | WT-STD vs <i>fat-1</i>    | **   | **** | n.s. | **      | ****    | n.s. | n.s. |
|             | WT-STD vs STD+n3          | **** | **** | **** | ****    | ****    | *    | n.s. |
|             | <i>fat-1</i> vs WT-STD+n3 | **** | **** | **** | ****    | ****    | n.s. | n.s. |
| Spleen      | WT-STD vs <i>fat-1</i>    | **** | **   | ***  | ****    | ****    | n.s. | n.s. |
|             | WT-STD vs STD+n3          | **** | **** | **** | ****    | ****    | n.s. | n.s. |
|             | <i>fat-1</i> vs WT-STD+n3 | **** | **** | ***  | ****    | ****    | n.s. | n.s. |
| Brain       | WT-STD vs <i>fat-1</i>    | +    | n.s. | n.s. | n.s.    | n.s.    | n.s. | n.s. |
|             | WT-STD vs STD+n3          | +    | n.s. | *    | *       | *       | n.s. | n.s. |
|             | <i>fat-1</i> vs WT-STD+n3 | **** | **   | n.s. | n.s.    | **      | n.s. | n.s. |
| Colon       | WT-STD vs <i>fat-1</i>    | n.s. | n.s. | n.s. | **      | n.s.    | n.s. | n.s. |
|             | WT-STD vs STD+n3          | **** | **** | *    | ****    | ****    | n.s. | **   |
|             | <i>fat-1</i> vs WT-STD+n3 | **** | **** | n.s. | **      | ****    | n.s. | *    |

+ For analytes that were not detectable in the WT-STD group, a t-test (two-tailed, unpaired), with Welch correction in case of unequal variances, was performed comparing *fat-1* and WT-STD+n3 groups.
