# Supplementary material for: Modulation of the endogenous omega-3 fatty acid and oxylipin profile in vivo—A comparison of the fat-1 transgenic mouse with C57BL/6 wildtype mice on an omega-3 fatty acid enriched diet
Source: PubMed Central journal article supplement (PMC5590967; doi:10.1371/journal.pone.0184470), 2017-09-08
Supplement: pone.0184470.s016.pdf [file pone.0184470.s016.pdf]

**S8 Table: Statistical comparison of the oxylipin profile in *fat-1* mice and wild type animals (WT-STD) on a standard sunflower oil based diet, as well as in wild type mice on the same diet enriched with EPA and DHA (WT-STD+n3) after 30 days of feeding. Statistical analysis was conducted using one-way ANOVA followed by Tukey's post test (\* p<0.05, \*\* p<0.01, \*\*\* p<0.001, \*\*\*\* p<0.0001; n.s. = not significant).**

A) Oxylipin Profile in Plasma

|               |                                    | WT-STD<br>vs<br><i>fat-1</i>           | STD<br>vs<br>WT-STD+n3 | <i>fat-1</i><br>vs<br>WT-STD+n3 |      |
|---------------|------------------------------------|----------------------------------------|------------------------|---------------------------------|------|
| <b>ARA</b>    | <b>Prostanoids</b>                 | 6-keto-PGF <sub>1α</sub>               | n.s.                   | n.s.                            | n.s. |
|               |                                    | PGF <sub>2α</sub> <sup>a</sup>         | -                      | -                               | -    |
|               |                                    | PGE <sub>2</sub>                       | n.s.                   | **                              | n.s. |
|               |                                    | PGD <sub>2</sub> <sup>b</sup>          | -                      | -                               | -    |
|               |                                    | PGJ <sub>2</sub> <sup>a</sup>          | -                      | -                               | -    |
|               |                                    | PGB <sub>2</sub> <sup>a</sup>          | -                      | -                               | -    |
|               |                                    | 15-deoxy-PGJ <sub>2</sub> <sup>a</sup> | -                      | -                               | -    |
|               |                                    | 11b-PGF <sub>2α</sub> <sup>a</sup>     | -                      | -                               | -    |
|               |                                    | 13,14dih-15k-PGF <sub>2α</sub>         | n.s.                   | *                               | n.s. |
|               |                                    | TxB <sub>2</sub>                       | n.s.                   | n.s.                            | n.s. |
|               | <b>Epoxy-FA</b>                    | 5(6)-EpETrE                            | n.s.                   | **                              | *    |
|               |                                    | 8(9)-EpETrE                            | n.s.                   | *                               | *    |
|               |                                    | 11(12)-EpETrE                          | n.s.                   | ****                            | ***  |
|               |                                    | 14(15)-EpETrE                          | n.s.                   | ****                            | ***  |
|               | <b>Dihydroxy-FA</b>                | 5,6-DiHETrE                            | n.s.                   | **                              | n.s. |
|               |                                    | 8,9-DiHETrE                            | n.s.                   | **                              | *    |
|               |                                    | 11,12-DiHETrE                          | n.s.                   | *                               | n.s. |
|               |                                    | 14,15-DiHETrE                          | n.s.                   | n.s.                            | n.s. |
|               | <b>Hydroxy-FA</b>                  | 5-HETE                                 | n.s.                   | *                               | n.s. |
|               |                                    | 8-HETE                                 | n.s.                   | *                               | **   |
|               |                                    | 9-HETE <sup>a</sup>                    | -                      | -                               | -    |
|               |                                    | 11-HETE                                | *                      | **                              | n.s. |
|               |                                    | 12-HETE                                | n.s.                   | n.s.                            | n.s. |
|               |                                    | 15-HETE                                | n.s.                   | **                              | n.s. |
|               |                                    | 20-HETE <sup>b</sup>                   | -                      | -                               | -    |
|               | <b>Multiple Hydroxylated FA</b>    | LTB <sub>4</sub> <sup>a</sup>          | -                      | -                               | -    |
|               |                                    | 6-trans-LTB <sub>4</sub> <sup>a</sup>  | -                      | -                               | -    |
|               |                                    | 20-COOH-LTB <sub>4</sub> <sup>a</sup>  | -                      | -                               | -    |
|               |                                    | 20-OH-LTB <sub>4</sub> <sup>a</sup>    | -                      | -                               | -    |
|               |                                    | LXA <sub>4</sub> <sup>a</sup>          | -                      | -                               | -    |
|               |                                    | 5,15-DiHETE <sup>a</sup>               | -                      | -                               | -    |
|               | <b>Isoprostanes</b>                | 8,15-DiHETE <sup>a</sup>               | -                      | -                               | -    |
|               |                                    | 5-iPF <sub>2α</sub> <sup>b</sup>       | -                      | -                               | -    |
| <b>Others</b> | 8-i-PGF <sub>2α</sub> <sup>a</sup> | -                                      | -                      | -                               |      |
|               | 5-oxo-ETE <sup>a</sup>             | -                                      | -                      | -                               |      |
|               | 15-oxo-ETE <sup>d</sup>            | n.s.                                   | -                      | -                               |      |

|                                 |                                 |                                       |      |      |      |
|---------------------------------|---------------------------------|---------------------------------------|------|------|------|
|                                 |                                 | 11,12-,15-TriHETrE <sup>a</sup>       | -    | -    | -    |
|                                 |                                 | THF diol <sup>a</sup>                 | -    | -    | -    |
| <b>EPA</b>                      | <b>Prostanoids</b>              | PGE <sub>3</sub> <sup>a</sup>         | -    | -    | -    |
|                                 |                                 | PGD <sub>3</sub> <sup>a</sup>         | -    | -    | -    |
|                                 |                                 | d17-6k-PGF <sub>1α</sub> <sup>a</sup> | -    | -    | -    |
|                                 |                                 | TxB <sub>3</sub> <sup>c</sup>         | -    | -    | -    |
|                                 |                                 |                                       |      |      |      |
|                                 | <b>Epoxy-FA</b>                 | 8(9)-EpETE <sup>c</sup>               | -    | -    | -    |
|                                 |                                 | 11(12)-EpETE <sup>c</sup>             | -    | -    | -    |
|                                 |                                 | 14(15)-EpETE <sup>d</sup>             | -    | -    | **   |
|                                 |                                 | 17(18)-EpETE <sup>d</sup>             | -    | -    | *    |
|                                 | <b>Dihydroxy-FA</b>             | 5,6-DiHETE <sup>a</sup>               | -    | -    | -    |
|                                 |                                 | 8,9-DiHETE <sup>a</sup>               | -    | -    | -    |
|                                 |                                 | 11,12-DiHETE <sup>d</sup>             | -    | -    | *    |
|                                 |                                 | 14,15-DiHETE                          | n.s. | ***  | ***  |
|                                 |                                 | 17,18-DiHETE                          | n.s. | ***  | **   |
|                                 | <b>Hydroxy-FA</b>               | 5-HEPE <sup>d</sup>                   | -    | -    | **   |
|                                 |                                 | 8-HEPE <sup>d</sup>                   | -    | -    | *    |
|                                 |                                 | 12-HEPE                               | n.s. | **   | **   |
|                                 |                                 | 15-HEPE <sup>c</sup>                  | -    | -    | -    |
|                                 |                                 | 18-HEPE <sup>d</sup>                  | -    | -    | **   |
|                                 |                                 | 19-HEPE                               | n.s. | **** | ***  |
| 20-HEPE                         |                                 | n.s.                                  | **   | **   |      |
| <b>Multiple Hydroxylated FA</b> | LTB <sub>5</sub> <sup>a</sup>   | -                                     | -    | -    |      |
|                                 | RvE1 <sup>a</sup>               | -                                     | -    | -    |      |
|                                 | RvE2 <sup>a</sup>               | -                                     | -    | -    |      |
|                                 | 18(S)-RvE3 <sup>a</sup>         | -                                     | -    | -    |      |
|                                 | 18(R)-RvE3 <sup>a</sup>         | -                                     | -    | -    |      |
| <b>Others</b>                   | 12-OH-17(18)-EpETE <sup>a</sup> | -                                     | -    | -    |      |
| <b>DHA</b>                      | <b>Epoxy-FA</b>                 | 10(11)-EpDPE                          | n.s. | ***  | **   |
|                                 |                                 | 13(14)-EpDPE                          | n.s. | **** | ***  |
|                                 |                                 | 16(17)-EpDPE                          | n.s. | **** | ***  |
|                                 |                                 | 19(20)-EpDPE                          | n.s. | **** | ***  |
|                                 | <b>Dihydroxy-FA</b>             | 4,5-DiHDPE                            | n.s. | **** | ***  |
|                                 |                                 | 7,8-DiHDPE                            | n.s. | **** | ***  |
|                                 |                                 | 10,11-DiHDPE                          | n.s. | **** | ***  |
|                                 |                                 | 13,14-DiHDPE                          | n.s. | **** | ***  |
|                                 |                                 | 16,17-DiHDPE                          | n.s. | ***  | **   |
|                                 |                                 | 19,20-DiHDPE                          | n.s. | **   | **   |
|                                 | <b>Hydroxy-FA</b>               | 4-HDHA                                | n.s. | **** | **** |
|                                 |                                 | 7-HDHA                                | n.s. | **** | **** |
|                                 |                                 | 8-HDHA                                | n.s. | **** | **** |
|                                 |                                 | 10-HDHA                               | n.s. | **** | ***  |
|                                 |                                 | 11-HDHA                               | n.s. | **** | **** |
|                                 |                                 | 13-HDHA                               | n.s. | **** | **** |
|                                 |                                 | 14-HDHA                               | n.s. | **   | **   |
|                                 |                                 | 16-HDHA                               | n.s. | **** | **** |

|                     |                                              |                                       |                               |      |      |      |
|---------------------|----------------------------------------------|---------------------------------------|-------------------------------|------|------|------|
|                     |                                              | 17-HDHA                               | n.s.                          | **** | **** |      |
|                     |                                              | 20-HDHA                               | n.s.                          | **** | **** |      |
|                     |                                              | 21-HDHA                               | n.s.                          | ***  | ***  |      |
|                     |                                              | 22-HDHA                               | n.s.                          | **   | **   |      |
|                     | <b>Multiple Hydroxylated FA</b>              | RvD1 <sup>a</sup>                     | -                             | -    | -    |      |
| <b>LA</b>           | <b>Epoxy-FA</b>                              | 9(10)-EpOME                           | n.s.                          | n.s. | n.s. |      |
|                     |                                              | 12(13)-EpOME                          | n.s.                          | n.s. | n.s. |      |
|                     | <b>Dihydroxy-FA</b>                          | 9,10-DiHOME                           | n.s.                          | n.s. | n.s. |      |
|                     |                                              | 12,13-DiHOME                          | n.s.                          | n.s. | n.s. |      |
|                     | <b>Hydroxy-FA</b>                            | 9-HODE                                | n.s.                          | n.s. | n.s. |      |
|                     |                                              | 13-HODE                               | *                             | n.s. | n.s. |      |
|                     | <b>Others</b>                                | EKODE                                 | n.s.                          | n.s. | n.s. |      |
|                     |                                              | 9-oxo-ODE                             | n.s.                          | n.s. | n.s. |      |
|                     |                                              | 13-oxo-ODE                            | n.s.                          | n.s. | n.s. |      |
|                     |                                              | 9,12,13-TriHOME                       | n.s.                          | n.s. | n.s. |      |
|                     |                                              | 9,10,13-TriHOME                       | n.s.                          | n.s. | n.s. |      |
|                     |                                              |                                       |                               |      |      |      |
|                     | <b>ALA</b>                                   | <b>Epoxy-FA</b>                       | 9(10)-EpODE                   | n.s. | n.s. | n.s. |
|                     |                                              |                                       | 12(13)-EpODE <sup>d</sup>     | -    | -    | n.s. |
| 15(16)-EpODE        |                                              |                                       | n.s.                          | n.s. | n.s. |      |
| <b>Dihydroxy-FA</b> |                                              | 9,10-DiHODE                           | *                             | n.s. | n.s. |      |
|                     |                                              | 12,13-DiHODE <sup>a</sup>             | -                             | -    | -    |      |
|                     |                                              | 15,16-DiHODE                          | n.s.                          | n.s. | n.s. |      |
| <b>Hydroxy-FA</b>   |                                              | 9-HOTrE                               | n.s.                          | n.s. | n.s. |      |
|                     |                                              | 13-HOTrE                              | n.s.                          | n.s. | n.s. |      |
| <b>DGLA</b>         |                                              | <b>Prostanoids</b>                    | PGE <sub>1</sub> <sup>a</sup> | -    | -    | -    |
|                     | PGD <sub>1</sub> <sup>a</sup>                |                                       | -                             | -    | -    |      |
|                     | PGF <sub>1α</sub> <sup>a</sup>               |                                       | -                             | -    | -    |      |
|                     | 15-k-PGF <sub>1α</sub> <sup>a</sup>          |                                       | -                             | -    | -    |      |
|                     | 13,14-dih-15-k-PGE <sub>1</sub> <sup>a</sup> |                                       | -                             | -    | -    |      |
|                     | TxB <sub>1</sub> <sup>a</sup>                |                                       | -                             | -    | -    |      |
|                     | <b>Hydroxy-FA</b>                            | 15(S)-HETrE                           | n.s.                          | n.s. | n.s. |      |
| <b>Oleic Acid</b>   |                                              | 9(10)-ep-stearic acid                 | n.s.                          | n.s. | n.s. |      |
|                     |                                              | 9,10-dih-stearic acid                 | n.s.                          | n.s. | n.s. |      |
| <b>C20:3 n9</b>     |                                              | LTB <sub>3</sub> <sup>a</sup>         | -                             | -    | -    |      |
| <b>C22:4 n6</b>     |                                              | dihomo-PGF <sub>2α</sub> <sup>a</sup> | -                             | -    | -    |      |

<sup>a</sup> analyte below LOQ in all groups; <sup>b</sup> analyte below LOQ in WT-STD+n3 and *fat-1*; <sup>c</sup> analyte below LOQ in WT-STD and *fat-1*; <sup>d</sup> For analytes that were below LOQ one of the three groups, a t-test (two-tailed, unpaired), with Welch correction in case of unequal variances, was performed.

B) Oxylipin Profile in Brain

|     |                             |                                        | WT-STD<br>vs<br><i>fat-1</i>          | STD<br>vs<br>WT-STD+n3 | <i>fat-1</i><br>vs<br>WT-STD+n3 |   |
|-----|-----------------------------|----------------------------------------|---------------------------------------|------------------------|---------------------------------|---|
| ARA | Prostanoids                 | 6-keto-PGF <sub>1α</sub>               | *                                     | ***                    | n.s.                            |   |
|     |                             | PGF <sub>2α</sub>                      | ***                                   | ****                   | n.s.                            |   |
|     |                             | PGE <sub>2</sub>                       | ****                                  | ****                   | n.s.                            |   |
|     |                             | PGD <sub>2</sub>                       | ****                                  | ****                   | n.s.                            |   |
|     |                             | PGJ <sub>2</sub>                       | n.s.                                  | n.s.                   | n.s.                            |   |
|     |                             | PGB <sub>2</sub> <sup>a</sup>          | -                                     | -                      | -                               |   |
|     |                             | 15-deoxy-PGJ <sub>2</sub> <sup>a</sup> | -                                     | -                      | -                               |   |
|     |                             | 11b-PGF <sub>2α</sub> <sup>a</sup>     | -                                     | -                      | -                               |   |
|     |                             | 13,14dih-15k-PGF <sub>2α</sub>         | ****                                  | ****                   | n.s.                            |   |
|     |                             | TxB <sub>2</sub>                       | ****                                  | ****                   | n.s.                            |   |
|     | Epoxy-FA                    | 5(6)-EpETrE                            | n.s.                                  | n.s.                   | n.s.                            |   |
|     |                             | 8(9)-EpETrE                            | n.s.                                  | n.s.                   | n.s.                            |   |
|     |                             | 11(12)-EpETrE                          | *                                     | n.s.                   | n.s.                            |   |
|     |                             | 14(15)-EpETrE                          | n.s.                                  | n.s.                   | n.s.                            |   |
|     | Dihydroxy-FA                | 5,6-DiHETrE <sup>a</sup>               | -                                     | -                      | -                               |   |
|     |                             | 8,9-DiHETrE <sup>a</sup>               | -                                     | -                      | -                               |   |
|     |                             | 11,12-DiHETrE                          | *                                     | n.s.                   | n.s.                            |   |
|     |                             | 14,15-DiHETrE                          | **                                    | *                      | n.s.                            |   |
|     | Hydroxy-FA                  | 5-HETE                                 | n.s.                                  | n.s.                   | n.s.                            |   |
|     |                             | 8-HETE                                 | n.s.                                  | n.s.                   | n.s.                            |   |
|     |                             | 9-HETE                                 | n.s.                                  | n.s.                   | **                              |   |
|     |                             | 11-HETE                                | ****                                  | ****                   | n.s.                            |   |
|     |                             | 12-HETE                                | n.s.                                  | n.s.                   | n.s.                            |   |
|     |                             | 15-HETE                                | ****                                  | ***                    | n.s.                            |   |
|     |                             | 20-HETE <sup>b</sup>                   | -                                     | -                      | -                               |   |
|     | Multiple<br>Hydroxylated FA | LTB <sub>4</sub> <sup>a</sup>          | -                                     | -                      | -                               |   |
|     |                             | 6-trans-LTB <sub>4</sub> <sup>a</sup>  | -                                     | -                      | -                               |   |
|     |                             | 20-COOH-LTB <sub>4</sub> <sup>a</sup>  | -                                     | -                      | -                               |   |
|     |                             | 20-OH-LTB <sub>4</sub> <sup>a</sup>    | -                                     | -                      | -                               |   |
|     |                             | LXA <sub>4</sub> <sup>a</sup>          | -                                     | -                      | -                               |   |
|     |                             | 5,15-DiHETE                            | ***                                   | n.s.                   | *                               |   |
|     |                             | 8,15-DiHETE                            | ***                                   | n.s.                   | *                               |   |
|     | Isoprostanes                | 5-iPF <sub>2α</sub> <sup>a</sup>       | -                                     | -                      | -                               |   |
|     |                             | 8-i-PGF <sub>2α</sub> <sup>a</sup>     | -                                     | -                      | -                               |   |
|     | Others                      | 5-oxo-ETE <sup>d</sup>                 | n.s.                                  | -                      | -                               |   |
|     |                             | 15-oxo-ETE                             | n.s.                                  | n.s.                   | n.s.                            |   |
|     |                             | 11,12-,15-TriHETrE <sup>b</sup>        | -                                     | -                      | -                               |   |
|     |                             | THF diol <sup>a</sup>                  | -                                     | -                      | -                               |   |
|     | EPA                         | Prostanoids                            | PGE <sub>3</sub> <sup>a</sup>         | -                      | -                               | - |
|     |                             |                                        | PGD <sub>3</sub> <sup>a</sup>         | -                      | -                               | - |
|     |                             |                                        | d17-6k-PGF <sub>1α</sub> <sup>a</sup> | -                      | -                               | - |
|     |                             |                                        | TxB <sub>3</sub> <sup>c</sup>         | -                      | -                               | - |

|                                 |                                 |                               |      |      |      |
|---------------------------------|---------------------------------|-------------------------------|------|------|------|
|                                 | <b>Epoxy-FA</b>                 | 8(9)-EpETE <sup>a</sup>       | -    | -    | -    |
|                                 |                                 | 11(12)-EpETE <sup>c</sup>     | -    | -    | -    |
|                                 |                                 | 14(15)-EpETE <sup>c</sup>     | -    | -    | -    |
|                                 |                                 | 17(18)-EpETE <sup>a</sup>     | -    | -    | -    |
|                                 | <b>Dihydroxy-FA</b>             | 5,6-DiHETE <sup>a</sup>       | -    | -    | -    |
|                                 |                                 | 8,9-DiHET <sup>a</sup>        | -    | -    | -    |
|                                 |                                 | 11,12-DiHETE <sup>a</sup>     | -    | -    | -    |
|                                 |                                 | 14,15-DiHETE <sup>a</sup>     | -    | -    | -    |
|                                 |                                 | 17,18-DiHETE <sup>d</sup>     | -    | -    | **   |
|                                 | <b>Hydroxy-FA</b>               | 5-HEPE <sup>c</sup>           | -    | -    | -    |
|                                 |                                 | 8-HEPE <sup>c</sup>           | -    | -    | -    |
|                                 |                                 | 12-HEPE                       | n.s. | n.s. | n.s. |
|                                 |                                 | 15-HEPE <sup>c</sup>          | -    | -    | -    |
|                                 |                                 | 18-HEPE <sup>d</sup>          | -    | -    | **** |
|                                 |                                 | 19-HEPE <sup>c</sup>          | -    | -    | -    |
|                                 |                                 | 20-HEPE <sup>c</sup>          | -    | -    | -    |
|                                 | <b>Multiple Hydroxylated FA</b> | LTB <sub>5</sub> <sup>a</sup> | -    | -    | -    |
|                                 |                                 | RvE1 <sup>a</sup>             | -    | -    | -    |
|                                 |                                 | RvE2 <sup>a</sup>             | -    | -    | -    |
|                                 |                                 | 18(S)-RvE3 <sup>a</sup>       | -    | -    | -    |
| 18(R)-RvE3 <sup>a</sup>         |                                 | -                             | -    | -    |      |
| <b>Others</b>                   | 12-OH-17(18)-EpETE <sup>a</sup> | -                             | -    | -    |      |
| <b>DHA</b>                      | <b>Epoxy-FA</b>                 | 10(11)-EpDPE                  | n.s. | n.s. | n.s. |
|                                 |                                 | 13(14)-EpDPE                  | n.s. | n.s. | n.s. |
|                                 |                                 | 16(17)-EpDPE                  | n.s. | n.s. | n.s. |
|                                 |                                 | 19(20)-EpDPE                  | n.s. | n.s. | n.s. |
|                                 | <b>Dihydroxy-FA</b>             | 4,5-DiHDPE <sup>a</sup>       | -    | -    | -    |
|                                 |                                 | 7,8-DiHDPE <sup>a</sup>       | -    | -    | -    |
|                                 |                                 | 10,11-DiHDPE <sup>a</sup>     | -    | -    | -    |
|                                 |                                 | 13,14-DiHDPE <sup>a</sup>     | -    | -    | -    |
|                                 |                                 | 16,17-DiHDPE <sup>a</sup>     | -    | -    | -    |
|                                 |                                 | 19,20-DiHDPE                  | n.s. | **** | ***  |
|                                 | <b>Hydroxy-FA</b>               | 4-HDHA                        | n.s. | **   | *    |
|                                 |                                 | 7-HDHA                        | n.s. | *    | **   |
|                                 |                                 | 8-HDHA                        | n.s. | ***  | **   |
|                                 |                                 | 10-HDHA                       | n.s. | *    | n.s. |
|                                 |                                 | 11-HDHA                       | n.s. | **   | *    |
|                                 |                                 | 13-HDHA                       | n.s. | n.s. | n.s. |
|                                 |                                 | 14-HDHA                       | n.s. | *    | n.s. |
|                                 |                                 | 16-HDHA                       | n.s. | n.s. | n.s. |
|                                 |                                 | 17-HDHA                       | n.s. | n.s. | n.s. |
|                                 |                                 | 20-HDHA                       | n.s. | n.s. | n.s. |
|                                 |                                 | 21-HDHA                       | n.s. | **** | **   |
|                                 |                                 | 22-HDHA                       | n.s. | *    | *    |
| <b>Multiple Hydroxylated FA</b> | RvD1 <sup>a</sup>               | -                             | -    | -    |      |

|            |                                       |                                              |      |      |      |
|------------|---------------------------------------|----------------------------------------------|------|------|------|
| LA         | Epoxy-FA                              | 9(10)-EpOME                                  | n.s. | n.s. | n.s. |
|            |                                       | 12(13)-EpOME                                 | n.s. | n.s. | n.s. |
|            | Dihydroxy-FA                          | 9,10-DiHOME                                  | *    | **   | n.s. |
|            |                                       | 12,13-DiHOME                                 | *    | **   | n.s. |
|            | Hydroxy-FA                            | 9-HODE                                       | *    | ***  | n.s. |
|            |                                       | 13-HODE                                      | **   | ***  | n.s. |
|            | Others                                | EKODE                                        | **   | **   | n.s. |
|            |                                       | 9-oxo-ODE                                    | *    | **   | n.s. |
|            |                                       | 13-oxo-ODE <sup>b</sup>                      | -    | -    | -    |
|            |                                       | 9,12,13-TriHOME                              | n.s. | *    | n.s. |
|            |                                       | 9,10,13-TriHOME                              | n.s. | n.s. | n.s. |
| ALA        | Epoxy-FA                              | 9(10)-EpODE <sup>b</sup>                     | -    | -    | -    |
|            |                                       | 12(13)-EpODE <sup>a</sup>                    | -    | -    | -    |
|            |                                       | 15(16)-EpODE <sup>b</sup>                    | -    | -    | -    |
|            | Dihydroxy-FA                          | 9,10-DiHODE <sup>b</sup>                     | -    | -    | -    |
|            |                                       | 12,13-DiHODE <sup>a</sup>                    | -    | -    | -    |
|            |                                       | 15,16-DiHODE <sup>a</sup>                    | -    | -    | -    |
|            | Hydroxy-FA                            | 9-HOTrE                                      | n.s. | *    | n.s. |
| 13-HOTrE   |                                       | *                                            | *    | n.s. |      |
| DGLA       | Prostanoids                           | PGE <sub>1</sub> <sup>b</sup>                | -    | -    | -    |
|            |                                       | PGD <sub>1</sub>                             | ***  | ***  | n.s. |
|            |                                       | PGF <sub>1α</sub>                            | ***  | ***  | n.s. |
|            |                                       | 15-k-PGF <sub>1α</sub> <sup>a</sup>          | -    | -    | -    |
|            |                                       | 13,14-dih-15-k-PGE <sub>1</sub> <sup>a</sup> | -    | -    | -    |
|            | TxB <sub>1</sub> <sup>a</sup>         | -                                            | -    | -    |      |
| Hydroxy-FA | 15(S)-HETrE                           | n.s.                                         | n.s. | n.s. |      |
| Oleic Acid | 9(10)-ep-stearic acid                 | n.s.                                         | n.s. | n.s. |      |
|            | 9,10-dih-stearic acid                 | n.s.                                         | n.s. | n.s. |      |
| C20:3 n9   | LTB <sub>3</sub> <sup>a</sup>         | -                                            | -    | -    |      |
| C22:4 n6   | dihomo-PGF <sub>2α</sub> <sup>d</sup> | **                                           | -    | -    |      |

<sup>a</sup> analyte below LOQ in all groups; <sup>b</sup> analyte below LOQ in WT-STD+n3 and *fat-1*; <sup>c</sup> analyte below LOQ in WT-STD and *fat-1*; <sup>d</sup> For analytes that were below LOQ one of the three groups, a t-test (two-tailed, unpaired), with Welch correction in case of unequal variances, was performed.

C) Oxylipin Profile in Colon

|     |                          |                                             | WT-STD<br>vs<br><i>fat-1</i> | STD<br>vs<br>WT-STD+n3 | <i>fat-1</i><br>vs<br>WT-STD+n3 |      |
|-----|--------------------------|---------------------------------------------|------------------------------|------------------------|---------------------------------|------|
| ARA | Prostanoids              | 6-keto-PGF <sub>1α</sub>                    | ***                          | ****                   | **                              |      |
|     |                          | PGF <sub>2α</sub>                           | *                            | ****                   | *                               |      |
|     |                          | PGE <sub>2</sub>                            | ****                         | ****                   | ****                            |      |
|     |                          | PGD <sub>2</sub>                            | **                           | ****                   | ***                             |      |
|     |                          | PGJ <sub>2</sub>                            | ***                          | ****                   | **                              |      |
|     |                          | PGB <sub>2</sub> <sup>a</sup>               | -                            | -                      | -                               |      |
|     |                          | 15-deoxy-PGJ <sub>2</sub> <sup>d</sup>      | n.s.                         | -                      | -                               |      |
|     |                          | 11b-PGF <sub>2α</sub> <sup>a</sup>          | -                            | -                      | -                               |      |
|     |                          | 13,14dih-15k-PGF <sub>2α</sub> <sup>a</sup> | -                            | -                      | -                               |      |
|     |                          | TxB <sub>2</sub>                            | n.s.                         | ****                   | ***                             |      |
|     | Epoxy-FA                 | 5(6)-EpETrE                                 | **                           | ****                   | **                              |      |
|     |                          | 8(9)-EpETrE                                 | *                            | ****                   | *                               |      |
|     |                          | 11(12)-EpETrE                               | *                            | ****                   | *                               |      |
|     |                          | 14(15)-EpETrE                               | *                            | ****                   | *                               |      |
|     | Dihydroxy-FA             | 5,6-DiHETrE <sup>d</sup>                    | **                           | -                      | -                               |      |
|     |                          | 8,9-DiHETrE                                 | n.s.                         | ***                    | ***                             |      |
|     |                          | 11,12-DiHETrE                               | n.s.                         | ***                    | **                              |      |
|     |                          | 14,15-DiHETrE                               | **                           | ****                   | ****                            |      |
|     | Hydroxy-FA               | 5-HETE                                      | ****                         | ****                   | **                              |      |
|     |                          | 8-HETE                                      | **                           | ****                   | *                               |      |
|     |                          | 9-HETE                                      | **                           | ****                   | **                              |      |
|     |                          | 11-HETE                                     | **                           | ****                   | **                              |      |
|     |                          | 12-HETE                                     | **                           | ****                   | n.s.                            |      |
|     |                          | 15-HETE                                     | **                           | ****                   | *                               |      |
|     |                          | 20-HETE <sup>d</sup>                        | n.s.                         | -                      | -                               |      |
|     | Multiple Hydroxylated FA | LTB <sub>4</sub>                            | ***                          | ****                   | n.s.                            |      |
|     |                          | 6-trans-LTB <sub>4</sub>                    | **                           | ****                   | *                               |      |
|     |                          | 20-COOH-LTB <sub>4</sub> <sup>d</sup>       | n.s.                         | -                      | -                               |      |
|     |                          | 20-OH-LTB <sub>4</sub> <sup>a</sup>         | -                            | -                      | -                               |      |
|     |                          | LXA <sub>4</sub> <sup>a</sup>               | -                            | -                      | -                               |      |
|     |                          | 5,15-DiHETE                                 | **                           | ****                   | n.s.                            |      |
|     | 8,15-DiHETE              | *                                           | ***                          | n.s.                   |                                 |      |
|     | Isoprostanes             | 5-iPF <sub>2α</sub>                         | ***                          | ****                   | n.s.                            |      |
|     |                          | 8-i-PGF <sub>2α</sub>                       | ****                         | ****                   | **                              |      |
|     | Others                   | 5-oxo-ETE                                   | n.s.                         | **                     | n.s.                            |      |
|     |                          | 15-oxo-ETE                                  | ****                         | ****                   | *                               |      |
|     |                          | 11,12-,15-TriHETrE                          | *                            | ****                   | *                               |      |
|     |                          | THF diol <sup>a</sup>                       | -                            | -                      | -                               |      |
|     | EPA                      | Prostanoids                                 | PGE <sub>3</sub>             | ***                    | ****                            | **** |
|     |                          |                                             | PGD <sub>3</sub>             | ***                    | ****                            | ***  |
|     |                          |                                             | d17-6k-PGF <sub>1α</sub>     | ***                    | ****                            | **** |
|     |                          |                                             | TxB <sub>3</sub>             | ****                   | ****                            | **** |

|                                 |                                 |                                 |              |      |      |
|---------------------------------|---------------------------------|---------------------------------|--------------|------|------|
|                                 | <b>Epoxy-FA</b>                 | 8(9)-EpETE <sup>d</sup>         | -            | -    | ***  |
|                                 |                                 | 11(12)-EpETE                    | *            | **** | **** |
|                                 |                                 | 14(15)-EpETE                    | *            | **** | **** |
|                                 |                                 | 17(18)-EpETE                    | n.s.         | n.s. | n.s. |
|                                 | <b>Dihydroxy-FA</b>             | 5,6-DiHETE <sup>d</sup>         | **           | -    | -    |
|                                 |                                 | 8,9-DiHETE <sup>d</sup>         | -            | -    | **** |
|                                 |                                 | 11,12-DiHETE <sup>d</sup>       | -            | -    | **** |
|                                 |                                 | 14,15-DiHETE <sup>d</sup>       | -            | -    | **** |
|                                 |                                 | 17,18-DiHETE                    | n.s.         | n.s. | n.s. |
|                                 | <b>Hydroxy-FA</b>               | 5-HEPE                          | n.s.         | **** | **** |
|                                 |                                 | 8-HEPE <sup>d</sup>             | -            | -    | *    |
|                                 |                                 | 12-HEPE                         | *            | **** | **   |
|                                 |                                 | 15-HEPE                         | ****         | **** | ***  |
|                                 |                                 | 18-HEPE                         | **           | **** | **** |
|                                 |                                 | 19-HEPE <sup>d</sup>            | -            | -    | ***  |
|                                 |                                 | 20-HEPE                         | n.s.         | *    | n.s. |
|                                 | <b>Multiple Hydroxylated FA</b> | LTB <sub>5</sub> <sup>c</sup>   | -            | -    | -    |
|                                 |                                 | RvE1 <sup>a</sup>               | -            | -    | -    |
|                                 |                                 | RvE2 <sup>a</sup>               | -            | -    | -    |
|                                 |                                 | 18(S)-RvE3 <sup>a</sup>         | -            | -    | -    |
|                                 |                                 | 18(R)-RvE3 <sup>a</sup>         | -            | -    | -    |
|                                 | <b>Others</b>                   | 12-OH-17(18)-EpETE <sup>a</sup> | -            | -    | -    |
|                                 | <b>DHA</b>                      | <b>Epoxy-FA</b>                 | 10(11)-EpDPE | n.s. | **** |
| 13(14)-EpDPE                    |                                 |                                 | n.s.         | **** | **** |
| 16(17)-EpDPE                    |                                 |                                 | n.s.         | **** | **** |
| 19(20)-EpDPE                    |                                 |                                 | n.s.         | **** | **** |
| <b>Dihydroxy-FA</b>             |                                 | 4,5-DiHDPE <sup>d</sup>         | -            | -    | **** |
|                                 |                                 | 7,8-DiHDPE <sup>c</sup>         | -            | -    | -    |
|                                 |                                 | 10,11-DiHDPE                    | n.s.         | **** | **** |
|                                 |                                 | 13,14-DiHDPE                    | n.s.         | **** | **** |
|                                 |                                 | 16,17-DiHDPE                    | ***          | **** | ***  |
|                                 |                                 | 19,20-DiHDPE                    | *            | **** | **** |
| <b>Hydroxy-FA</b>               |                                 | 4-HDHA                          | n.s.         | **** | **** |
|                                 |                                 | 7-HDHA                          | n.s.         | **** | **** |
|                                 |                                 | 8-HDHA                          | n.s.         | **** | **** |
|                                 |                                 | 10-HDHA                         | n.s.         | *    | n.s. |
|                                 |                                 | 11-HDHA                         | n.s.         | **   | **   |
|                                 |                                 | 13-HDHA                         | *            | **** | **   |
|                                 |                                 | 14-HDHA                         | n.s.         | n.s. | n.s. |
|                                 |                                 | 16-HDHA                         | *            | **** | **** |
|                                 |                                 | 17-HDHA                         | n.s.         | n.s. | n.s. |
|                                 |                                 | 20-HDHA                         | *            | **** | **** |
|                                 |                                 | 21-HDHA                         | n.s.         | ***  | ***  |
|                                 |                                 | 22-HDHA                         | n.s.         | ***  | **   |
| <b>Multiple Hydroxylated FA</b> |                                 | RvD1 <sup>a</sup>               | -            | -    | -    |



|            |                               |                                     |      |      |      |
|------------|-------------------------------|-------------------------------------|------|------|------|
| LA         | Epoxy-FA                      | 9(10)-EpOME                         | n.s. | n.s. | n.s. |
|            |                               | 12(13)-EpOME                        | n.s. | n.s. | n.s. |
|            | Dihydroxy-FA                  | 9,10-DiHOME                         | n.s. | n.s. | n.s. |
|            |                               | 12,13-DiHOME                        | n.s. | n.s. | n.s. |
|            | Hydroxy-FA                    | 9-HODE                              | n.s. | *    | *    |
|            |                               | 13-HODE                             | n.s. | *    | n.s. |
|            | Others                        | EKODE                               | n.s. | n.s. | n.s. |
|            |                               | 9-oxo-ODE                           | n.s. | n.s. | n.s. |
|            |                               | 13-oxo-ODE                          | n.s. | n.s. | n.s. |
|            |                               | 9,12,13-TriHOME                     | n.s. | **   | n.s. |
|            |                               | 9,10,13-TriHOME                     | *    | n.s. | n.s. |
|            |                               |                                     |      |      |      |
| ALA        | Epoxy-FA                      | 9(10)-EpODE                         | n.s. | n.s. | n.s. |
|            |                               | 12(13)-EpODE                        | n.s. | n.s. | n.s. |
|            |                               | 15(16)-EpODE                        | n.s. | n.s. | n.s. |
|            | Dihydroxy-FA                  | 9,10-DiHODE                         | n.s. | n.s. | n.s. |
|            |                               | 12,13-DiHODE <sup>a</sup>           | -    | -    | -    |
|            |                               | 15,16-DiHODE                        | n.s. | n.s. | n.s. |
|            | Hydroxy-FA                    | 9-HOTrE                             | n.s. | n.s. | n.s. |
|            |                               | 13-HOTrE                            | n.s. | n.s. | n.s. |
| DGLA       | Prostanoids                   | PGE <sub>1</sub>                    | **** | **** | n.s. |
|            |                               | PGD <sub>1</sub>                    | ***  | **** | n.s. |
|            |                               | PGF <sub>1α</sub>                   | **   | ***  | n.s. |
|            |                               | 15-k-PGF <sub>1α</sub> <sup>a</sup> | -    | -    | -    |
|            |                               | 13,14-dih-15-k-PGE <sub>1</sub>     | ***  | **** | n.s. |
|            |                               | TxB <sub>1</sub>                    | *    | *    | n.s. |
|            | Hydroxy-FA                    | 15(S)-HETrE                         | ***  | ***  | n.s. |
| Oleic Acid | 9(10)-ep-stearic acid         | n.s.                                | n.s. | n.s. |      |
|            | 9,10-dih-stearic acid         | n.s.                                | *    | **   |      |
| C20:3 n9   | LTB <sub>3</sub> <sup>a</sup> | -                                   | -    | -    |      |
| C22:4 n6   | dihomo-PGF <sub>2α</sub>      | ***                                 | **** | *    |      |

<sup>a</sup> analyte below LOQ in all groups; <sup>b</sup> analyte below LOQ in WT-STD+n3 and *fat-1*; <sup>c</sup> analyte below LOQ in WT-STD and *fat-1*; <sup>d</sup> For analytes that were below LOQ one of the three groups, a t-test (two-tailed, unpaired), with Welch correction in case of unequal variances, was performed.
