# Supplementary material for: Modulation of the endogenous omega-3 fatty acid and oxylipin profile in vivo—A comparison of the fat-1 transgenic mouse with C57BL/6 wildtype mice on an omega-3 fatty acid enriched diet
Source: PLoS One. 2017 Sep 8;12(9):e0184470. doi: 10.1371/journal.pone.0184470 (PMC5590967; doi:10.1371/journal.pone.0184470)
Supplement: S4 Table — (XLSX) [file pone.0184470.s012.xlsx]

## Sheet: S4 Table
S4 Table: n6/n3 ratio and %EPA+DHA in blood and tissues of the experimental groups. Wild type mice are shown at the beginning of the experiment (Day 0) and during the course of the feeding experiment with a standard sunflower oil based diet (STD) or the same diet enriched with n3-PUFA (1% EPA and 1% DHA as ethyl ester, STD+n3). Transgenic fat-1 mice are shown at baseline (Day 0) and after 30 days…
		n6/n3 ratio								%EPA+DHA [%]
fat -1		Whole Blood	Plasma	Blood Cells	Liver	Kidney	Spleen	Colon	Brain	Whole Blood	Plasma	Blood Cells	Liver	Kidney	Spleen	Colon	Brain
Day 0	Mean	3.14352	4.42336	2.15965	3.37255	2.35097	2.07377	4.48143	0.776401	8.22298	6.71264	10.2567	8.37028	11.4937	8.07746	4.26454	18.1249
	SEM	0.122672	0.0608453	0.0303272	0.0865885	0.108882	0.189467	0.536006	0.03142	0.269708	0.255232	0.133793	0.24996	0.731725	0.859376	0.875538	0.411827
Day 30	Mean	4.41249	6.911	3.66257	5.12329	2.51594	3.58164	16.4045	0.82896	7.63541	6.66925	7.4225	6.93288	13.0609	6.4632	2.17108	16.3222
	SEM	0.189787	0.730647	0.112857	0.341337	0.113154	0.537765	5.32913	0.0170982	0.370997	0.595679	0.18656	0.521391	0.409118	0.831622	0.652238	0.873062
Wild Type
Day 0	Mean	6.01583	6.57001	4.54711	4.52933	3.40182	5.66132	6.70343	0.912744	5.43585	5.49376	6.76609	6.57861	8.74066	4.09583	3.66011	16.6215
	SEM	0.217369	0.317554	0.0441773	0.129011	0.177092	0.36319	0.195974	0.0295727	0.233729	0.304672	0.0670444	0.375119	0.712641	0.668035	0.15508	0.407372
STD
Day 7	Mean	8.96634	14.1333	5.50437	6.86485	3.7257	7.77579	19.776	0.852254	4.42314	3.40151	6.01095	5.65388	9.66097	4.02969	1.41558	16.6604
	SEM	0.447664	1.06205	0.0917271	0.241109	0.134834	0.499167	3.31972	0.0289518	0.202017	0.279332	0.123013	0.279959	0.391587	0.402355	0.30904	0.407258
Day 14	Mean	10.125	16.441	6.49214	9.8339	4.08717	9.20019	28.379	0.954026	4.07896	3.06006	5.21919	3.9054	8.91989	3.74895	1.05907	16.4702
	SEM	0.266699	0.396113	0.0696041	0.400597	0.165385	0.277254	3.8019	0.0522845	0.11654	0.0832976	0.0653649	0.160535	0.400983	0.140115	0.152427	0.54128
Day 30	Mean	12.4183	20.3195	9.27621	10.5399	5.0907	12.6002	41.6251	0.88789	3.49333	2.52697	3.93223	3.65508	7.45176	2.66526	0.779249	17.1082
	SEM	0.720137	0.799895	0.311795	0.605021	0.391778	0.136897	6.70223	0.0172074	0.192134	0.127681	0.0775218	0.241509	0.615485	0.0978774	0.138854	0.265651
Day 45	Mean	11.6229	21.1471	10.6852	15.6599	4.90013	14.6311	34.6092	0.994724	3.69003	2.42318	3.45165	2.32606	7.64586	2.36345	0.936916	15.6297
	SEM	0.70106	1.04913	0.196427	0.801466	0.346365	0.985258	7.5291	0.0227682	0.199606	0.113062	0.0790142	0.232434	0.567825	0.209134	0.174957	0.558595
STD+n3
Day 7	Mean	2.11848	1.37757	2.1527	1.19708	1.33538	1.39385	4.49775	0.830233	13.7482	22.0816	12.1644	20.7574	19.5236	13.3804	5.38427	16.872
	SEM	0.202167	0.0750893	0.0329176	0.0595876	0.0483845	0.0148985	0.457188	0.0297745	0.747018	0.718153	0.167616	0.596803	0.762978	0.295715	0.674493	0.412563
Day 14	Mean	1.69955	1.60828	1.58064	1.56961	1.12133	1.21163	2.91338	0.814926	15.6138	20.1584	14.5025	15.4936	21.4863	14.2959	7.76558	17.5429
	SEM	0.0534939	0.0520536	0.0409338	0.0766184	0.0374769	0.0305032	0.291667	0.0249647	0.246844	0.424187	0.271515	0.575058	0.760399	0.277242	0.772346	0.312202
Day 30	Mean	1.34315	1.5447	1.15565	1.25479	0.950443	1.11117	3.63728	0.667915	18.2326	21.0194	17.3996	19.4992	24.281	15.4569	6.44284	19.15
	SEM	0.0401528	0.0826947	0.0196217	0.08963	0.0306377	0.0290416	0.277996	0.0188651	0.533134	0.942856	0.268909	1.18324	0.624018	0.3436	0.470824	0.316773
Day 45	Mean	1.29353	1.65481	1.08074	1.60357	1.04428	1.25168	2.7175	0.693159	18.455	19.9902	17.8638	16.6921	22.7594	14.3379	8.68169	17.596
	SEM	0.017289	0.0787422	0.00792751	0.119102	0.051907	0.0931682	0.150598	0.02694	0.733455	0.694619	0.0966184	0.871318	0.866063	0.783973	0.556936	0.48802
